# Supplementary material
Source: HighWire-hosted journal article supplement (https://bmjopen.bmj.com/content/12/6/e056594)
Supplement: inline-supplementary-material-3 [file inline-supplementary-material-3.pdf]

### Appendix 3: Informed consent for FMT donors

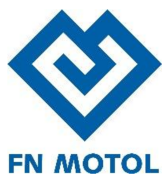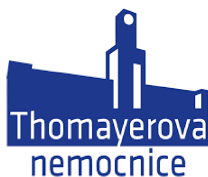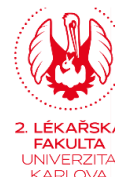

**Informovaný souhlas dospělé osoby s účastí na výzkumu změn střevního mikrobiomu u dospělých pacientů se syndromem dráždivého tračníku ve vědeckém projektu týmů Thomayerovy nemocnice a Fakultní nemocnice v Motole.**

Vážená paní/vážený pane,

syndrom dráždivého tračníku (irritable bowel syndrome, dále jen IBS) je nejčastější funkční onemocnění trávicího traktu, které pacienta výrazně omezuje v jeho každodenním životě. Může se projevat různě, nejčastěji však jako delší dobu trvající bolest břicha s náhle vzniklým nutkáním na stolici. Léčba této nemoci je zdoluhavá, obtížná a ne vždy úspěšná. Dle recentních studií se však jako účinná léčebná metoda jeví transplantace střevní mikrobioty (faecal microbiota transplantation, dále jen FMT). A právě na její využití se zaměřuje náš projekt v podobě klinické intervenční studie.

Cílem projektu je zjistit, zda je transplantace stolice účinnou léčebnou metodou IBS a jak se po FMT mění složení střevní mikrobioty. K tomu abychom FMT mohli provést je potřeba mít vhodné dárce stolice. A právě zde byste nám mohli pomoci. Znalosti změn složení střevní mikrobioty po FMT bychom pak v budoucnu mohli využít buď k cílené ATB terapii negativně asociovaných bakterií nebo naopak k podávání probiotika prospěšných kmenů.

**Proto si Vás dovoluujeme pozvat k účasti na projektu vědeckých týmů Thomayerovy nemocnice a Fakultní nemocnice v Motole. Přečtěte si, prosím, toto poučení.** Pokud plně nerozumíte tomuto textu nebo pokud potřebujete doplňující informace, neváhejte se zeptat lékaře na emailu uvedeném níže. **Pokud souhlasíte s Vaší účastí ve studii, vyplňte prosím kontaktní údaje níže dokumentu a podepište prosím prohlášení, které se nachází v závěru tohoto informovaného souhlasu. Vaše účast je dobrovolná.** Tento souhlas můžete kdykoli zrušit, a to i bez udání důvodu.

Získání vzorku stolice by probíhalo ve vašem domácím prostředí. Stolice by bylo potřeba uchovat v běžném domácím mrazáku (teplota  $-20^{\circ}\text{C}$ ), k odběru byste byli vybaveni jednoduchými odběrovými sety s návodem a poučením o jejich používání. Po domluvě se členy vědeckého týmu (kontakt níže) by vzorky byly převezeny na naše pracoviště a hluboce zamrazeny ( $-80^{\circ}\text{C}$ ).

**Celý proces je dvoufázový.** Z prvního vzorku se provede molekulárně-genetická analýza a následně bioinformatické zpracování dat. Na základě výsledků bude vybráno asi 10-20 dárců, které kontaktujeme na základě informací uvedených níže. Splní-li kritéria vhodného dárce (pro vyžádání lze napsat na mail [jiri.vejmelka@ftn.cz](mailto:jiri.vejmelka@ftn.cz) nebo zavolat na tel.č. 731446619), budou poté znovu požádáni o darování stolice.

Po zpracování pro účely aktuální studie budou vzorky uchovány v hlubokomrazícím boxu v laboratořích Fakultní nemocnice v Motole. Jejich další využití proběhne pouze po přesné specifikaci formou dalšího souhlasu a Vaším podepsáním nového souhlasu.

V tomto projektu řádně dbáme o bezpečnost osobních údajů podle platných zákonů. Zejména je pak zcela zachována úplná anonymita pacienta při odesílání vzorků mimo naše pracoviště nebo při

### Appendix 3: Informed consent for FMT donors

zveřejňování vědeckých výsledků získaných z naší práce v odborných časopisech. Odebrané vzorky a z nich získané části jsou v našich laboratořích skladovány na dobu neurčitou, odděleně od osobních dat. Pokud byste v budoucnu svůj souhlas odvolali, Vaše jméno a ostatní osobní data budou bez prodlení vymazána z našich databází i papírových záznamů tak, aby se už nikdo nemohl dozvědět, komu vzorek patřil.

Bližší informace o nemoci jako takové můžete získat od členů vědeckého týmu:

**MUDr. Jiří Vejmelka** (Thomayerova nemocnice), tel: 731446619, email: [jiri.vejmelka@ftn.cz](mailto:jiri.vejmelka@ftn.cz)

**MUDr. Jakub Hurych** (Fakultní nemocnice v Motole), tel. 224432089, email:

[jakub.hurych@lfmotol.cuni.cz](mailto:jakub.hurych@lfmotol.cuni.cz)

#### **Souhlas se zpracováním osobních údajů (dále jen „Souhlas“)**

udělený ve smyslu zákona č. 101/2000 Sb., o ochraně osobních údajů a o změně některých zákonů, ve znění pozdějších předpisů a s Nařízením Evropského parlamentu a Rady (EU) 2016/679

#### **Já, níže podepsaný**

*Jméno a příjmení:* .....

*Datum narození:* .....

*Rodné číslo:* .....

*Kontaktní email:* .....

*Telefonní číslo:* .....

#### **Souhlasím se zpracováním svých osobních údajů/ osobních údajů osoby jejíž jsem zákonným zástupcem Fakultní nemocnicí v Motole a Thomayerově nemocnici v rozsahu těchto údajů:**

*Jméno, příjmení, titul, datum a místo narození, rodné číslo, národnost, pohlaví, místo trvalého pobytu, telefon, email, výška, hmotnost*

Tento projev vůle je platný pouze v případě, že mé osobní údaje budou zpracovávány pouze v rozsahu nezbytném pro dosažení účelu zpracování uvedeného v tomto souhlasném prohlášení a v souladu s příslušnou legislativou v platném znění.

#### **Souhlas je poskytnut za účelem:**

*Zpracování vzorku stolice pro vědecko-výzkumnou činnost mající za cíl přispět k porozumění změn střevního mikrobiomu u dospělých pacientů se syndromem dráždivého tračníku*

#### **Souhlasím se zpracováním svých osobních údajů Fakultní nemocnicí v Motole a Thomayerově nemocnici po dobu:**

*Do odebrání mého souhlasu*

#### **Souhlasím se zpřístupněním svých osobních údajů Fakultní nemocnici v Motole a Thomayerově nemocnici:**

Fakultní nemocnice v Motole a Thomayerova nemocnice je oprávněna použít mé osobní údaje pouze v souladu s výše

uvedeným účelem a po výše uvedenou dobu, nebo pro legitimní potřebu státních kontrolních

### Appendix 3: Informed consent for FMT donors

orgánů a orgánů činných v trestním řízení.

**Fakultní nemocnice v Motole a Thomayerova nemocnice** je dále oprávněna poskytnout mé osobní údaje pouze subjektům spolupracujícím s **Fakultní nemocnicí v Motole a Thomayerovou nemocnicí** na dosažení primárního účelu, pro který je udělen tento souhlas. S takovými subjekty se **Fakultní nemocnice v Motole a Thomayerova nemocnice** zavazuje uzavřít smlouvu obsahující stejné podmínky pro zpracování mých osobních údajů. Zpracování bude probíhat v souladu s příslušnými právními normami o ochraně osobních údajů a s Nařízením Evropského parlamentu a Rady (EU) 2016/679 ze dne 27. dubna 2016 o ochraně fyzických osob v souvislosti se zpracováním osobních údajů a o volném pohybu těchto údajů a o zrušení směrnice 95/46/ES (obecné nařízení o ochraně osobních údajů).

#### **Byl/a jsem poučen/a o tom, že poskytnutí údajů je dobrovolné.**

Dále jsem byl/a v souladu s příslušnou legislativou poučen/a:

- O svém právu tento souhlas odvolat, a to i bez udání důvodu,
- O svém právu přístupu k těmto údajům a právu na jejich opravu,
- O svém právu na vymazání těchto údajů, pokud dochází k jejich zpracování v rozporu s ochranou definovanou příslušnou legislativou nebo v rozporu s tímto souhlasem, nebo byl souhlas odvolán, svém právu podat stížnost u Úřadu pro ochranu osobních údajů.

Byl/a jsem také poučen/a o tom, že tato svá práva mohu uplatnit doručením žádosti na adresu: Fakultní nemocnice v Motole, Samostatné oddělení pověřence pro ochranu osobních údajů, V Úvalu 84, Praha 5.

Beru na vědomí, že odvolání tohoto souhlasu může ovlivnit dosažení účelu, pro který byl tento souhlas vydán, pokud tohoto účelu nelze dosáhnout jinak.

Prohlašuji, že jsem textu poučení porozuměl(a) a byl jsem lékařem srozumitelně informován(a) o povaze daného vyšetření a že jsem měl(a) možnost klást lékařovi doplňující dotazy.

Na základě tohoto poučení dále prohlašuji, že souhlasím se zařazením svých vzorků do studie probíhající v **Thomayerově nemocnici a Fakultní nemocnici v Motole**, jejímž cílem je porozumět změnám složení střevního mikrobiomu u dospělých pacientů se syndromem dráždivého tračníku.

V ..... dne .....

**Jméno a příjmení vyšetřované osoby** : .....

Podpis vyšetřované osoby .....

Prohlašuji, že jsem vysvětlil podstatu, účel a povahu odběrů pacientovi způsobem, který byl podle mého soudu srozumitelný.

**Jméno a příjmení lékaře**: .....

Podpis: .....

Datum: .....
